# Supplementary material for: Oxidative Stress and Mitochondrial Complex I Dysfunction Correlate with Neurodegeneration in an α-Synucleinopathy Animal Model
Source: MDPI journal article supplement (doi:10.3390/ijms231911394), 2022-09-27
Supplement: s1 [file s1]

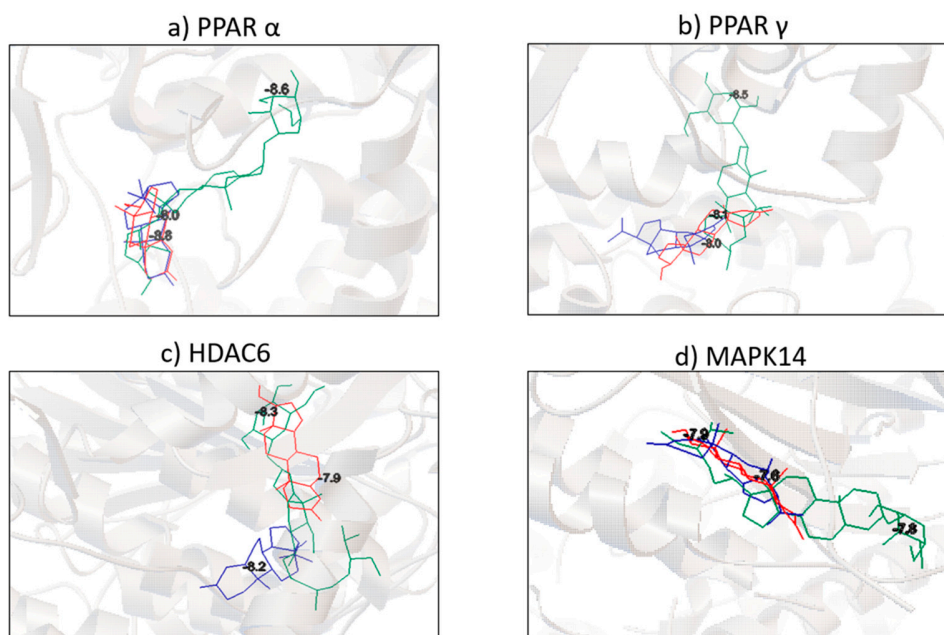

**Figure S1.** Molecular docking 3D representations between ligands (BSSG and positive controls) and (a) PPAR $\alpha$ , (b) PPAR $\gamma$ , (c) HDAC6 and (d) MAPK14. BSSG is represented in green, whereas positive controls are represented in red (testosterone) and blue (progesterone). These 3D representations were obtained from AutoDock tools.

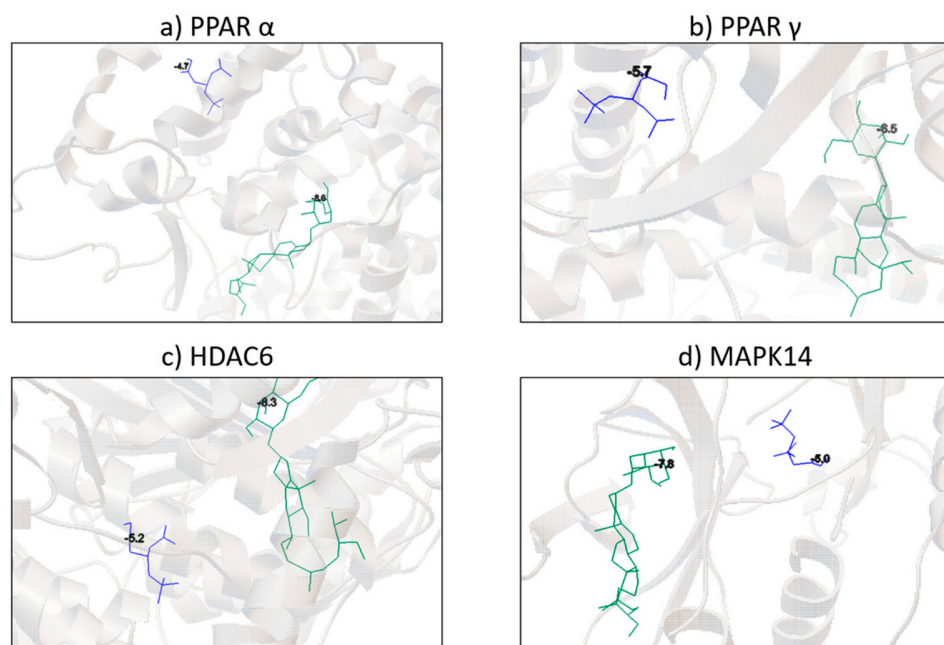

**Figure S2.** Molecular docking 3D representations between ligands (BSSG and negative control) and (a) PPAR $\alpha$ , (b) PPAR $\gamma$ , (c) HDAC6 and (d) MAPK14. BSSG is represented in green, whereas the negative control (propanaminium) is in blue. These 3D representations were obtained from AutoDock tools.

**Table S1.** Comparative results of molecular docking between BSSG and negative (-) and positive (+) controls.

| Compound          | $\Delta G$ (kcal/mol) |               |       |        |
|-------------------|-----------------------|---------------|-------|--------|
|                   | PPAR $\alpha$         | PPAR $\gamma$ | HDAC6 | MAPK14 |
| Propanaminium (-) | -4.7                  | -5.7          | -5.2  | -5.0   |
| Testosterone (+)  | -8.0                  | -8.1          | -7.9  | -7.6   |
| Progesterone (+)  | -8.8                  | -8.0          | -8.2  | -7.9   |
| BSSG              | -8.6                  | -8.5          | -8.3  | -7.8   |

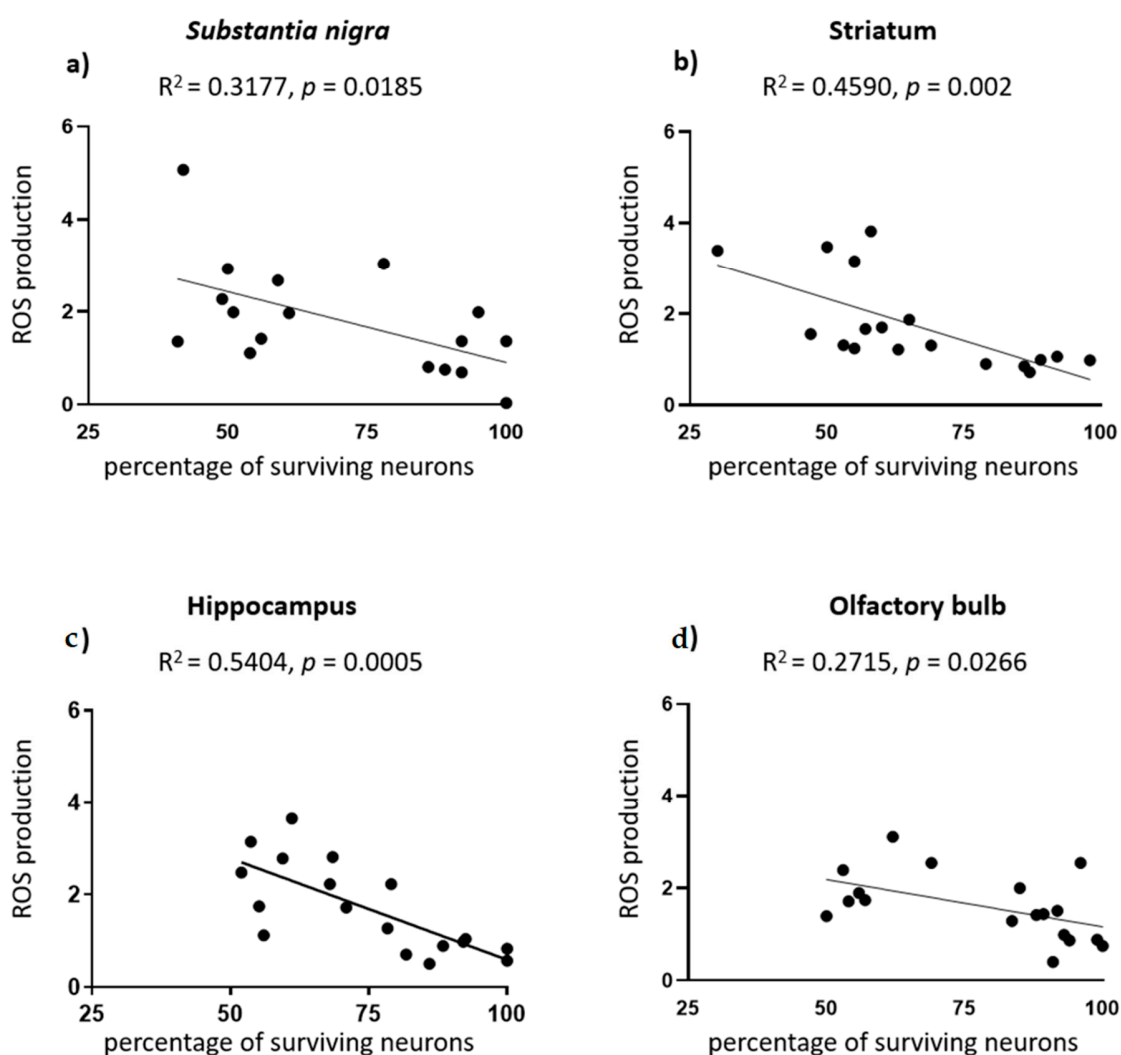

**Figure S3.** Correlation analysis of radical oxygen species (ROS) with the percentage of survival neurons in *substantia nigra* (a), striatum (b), hippocampus (c), and olfactory bulb (d). Pearson's correlation coefficient and linear regression appear on the top of every graph.  $p < 0.05$  was considered a statistically significant difference.

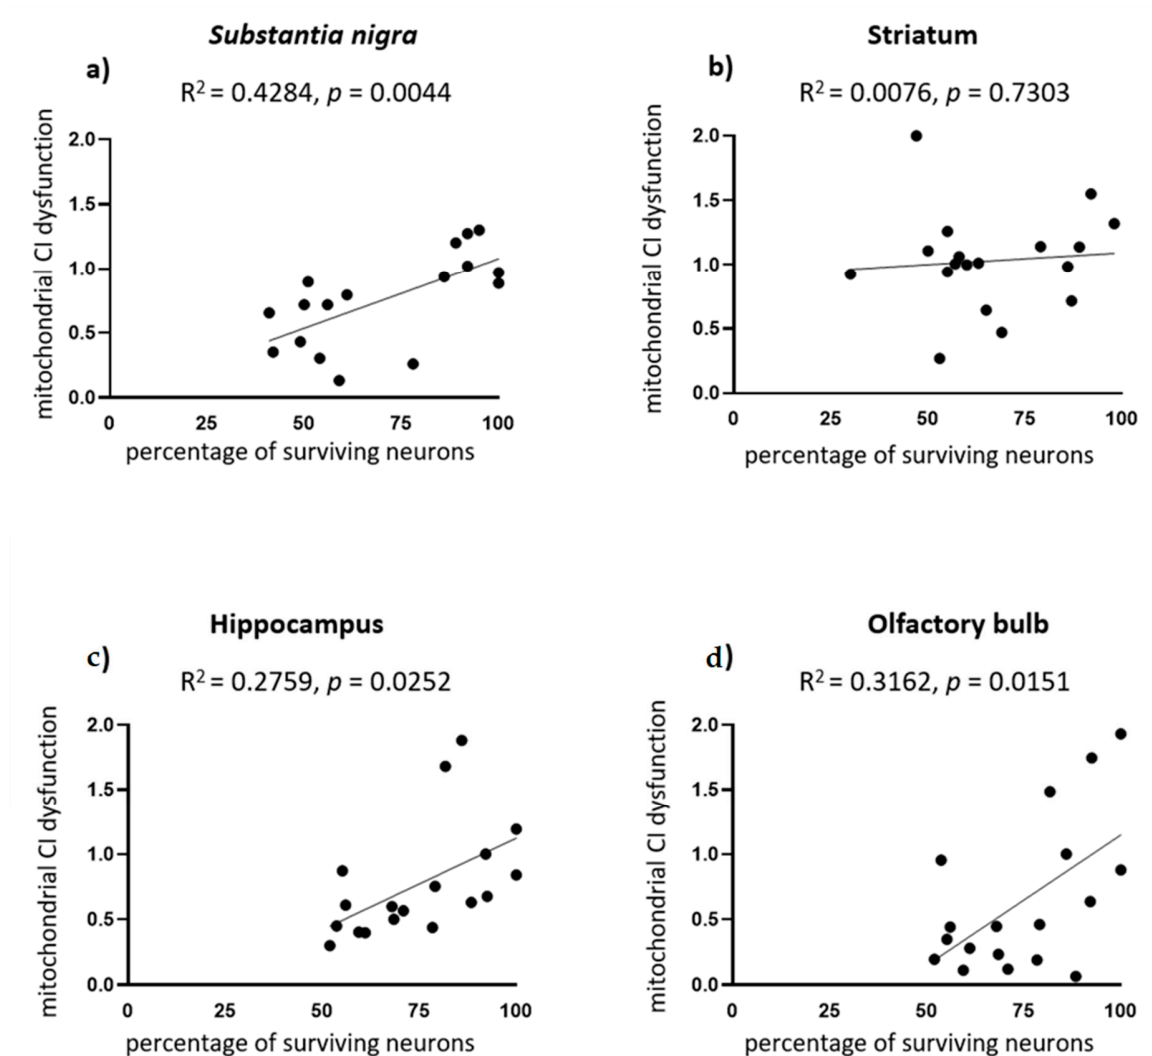

**Figure S4.** Correlation analysis of mitochondrial complex I (CI) dysfunction with the percentage of survival neurons in *substantia nigra* (a), striatum (b), hippocampus (c), and olfactory bulb (d). Pearson's correlation coefficient and linear regression appear on the top of every graph.  $p < 0.05$  was considered a statistically significant difference.

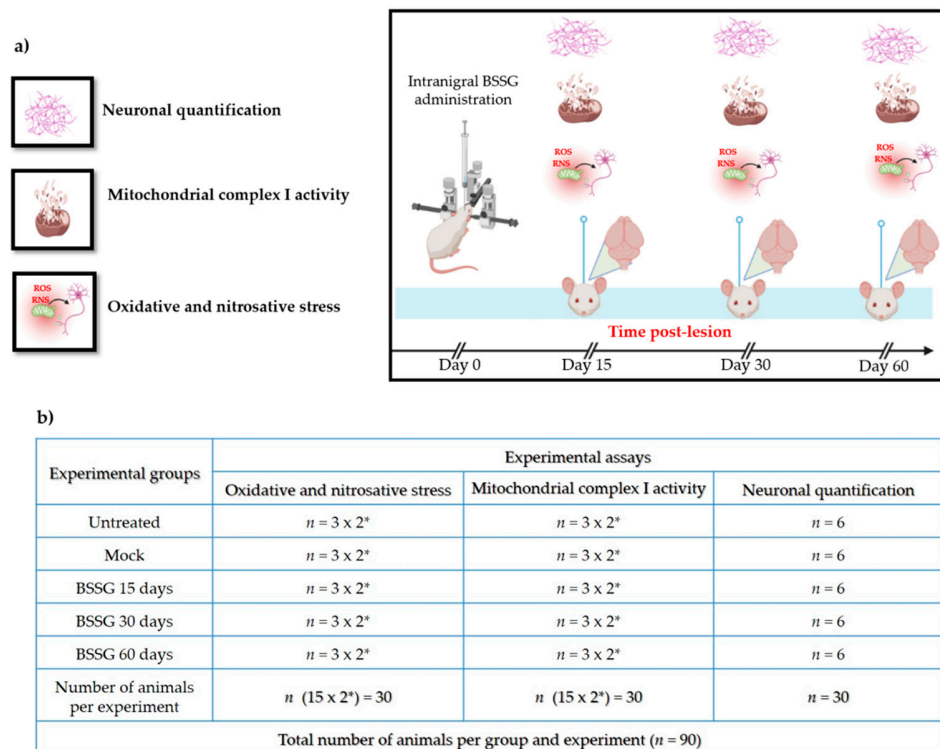

**Figure S5.** Experimental design. (a) Representative illustration of experimental assays evaluated through a temporal line. (b) The table shows the number of animals used by subgroups and experimental assays. \* Since  $n = 6$  animals per GROUP were used in the biochemical assays, these were performed in two independent experiments ( $n = 3$  animals per group and experiment). The Figure was created using Biorender.com.
